# Supplementary material for: On Genetic Specificity in Symbiont-Mediated Host-Parasite Coevolution
Source: PLOS journal article supplement (doi:10.1371/journal.pcbi.1002633), 2012-08-30
Supplement: S3 (10.1371/journal.pcbi.1002633.s003) [file journal.pcbi.1002633.s003]

## S2. Matrices of high specificity

Master matrices of high specificity of any of the three kinds are of particular forms: the higher the specificity, the closer the matrix is to one of the limit matrices in Figure 1 below. These matrices are obtained by solving the equations  $\mathbf{M}^{\text{HP}} = \begin{pmatrix} 1 & 0 \\ 0 & 1 \end{pmatrix}$ ,  $\mathbf{M}^{\text{SP}} = \begin{pmatrix} 1 & 0 \\ 0 & 1 \end{pmatrix}$ , and  $\mathbf{M}^{\text{HS}} = \begin{pmatrix} 1 & 0 \\ 0 & 1 \end{pmatrix}$ , under the constraint that the symbionts are in principle beneficial, i.e.  $m_{xy,z} \geq m_{x-,z}$  for all  $x = a, A$ ,  $y = s, S$  and  $z = b, B$ . Below we briefly discuss the consequences of high specificities.

**High HP-specificity** reduces the differences between symbiont-bearing and symbiont-free hosts when the host and parasite background is fixed:  $|m_{xy,z} - m_{x-,z}|$  becomes close to zero. Thus it can be expected that the persistence of symbionts becomes more sensitive to the costs of infection. High host-parasite specificity also reduces the differences between the effects of different symbiont alleles.

**High SP-specificity** reduces the effect of the host allele on the outcome of the interaction:  $|m_{ay,z} - m_{Ay,z}|$  becomes close to zero. Another consequence of high SP-specificity is that the symbiont-free hosts are not able to resist infection.

**High HS-specificity** makes the outcome of the parasite attack insensitive to the parasite genotype:  $|m_{xy,b} - m_{xy,B}|$  is close to zero. Symbiont-free hosts are very susceptible to infection, but two of the four host-symbiont associations are largely immune.

$$\begin{array}{ccc}
 \begin{array}{c} \text{b} \quad \text{B} \\ \text{a-} \begin{pmatrix} 1 & 0 \\ 0 & 1 \end{pmatrix} \\ \text{A-} \\ \text{as} \\ \text{As} \\ \text{aS} \\ \text{AS} \end{array} &
 \begin{array}{c} \text{b} \quad \text{B} \\ \text{a-} \begin{pmatrix} 0 & 0 \\ 0 & 0 \end{pmatrix} \\ \text{A-} \\ \text{as} \\ \text{As} \\ \text{aS} \\ \text{AS} \end{array} &
 \begin{array}{c} \text{b} \quad \text{B} \\ \text{a-} \begin{pmatrix} 0 & 0 \\ 0 & 0 \end{pmatrix} \\ \text{A-} \\ \text{as} \\ \text{As} \\ \text{aS} \\ \text{AS} \end{array}
 \end{array}$$

Figure 1: Master matrices with maximal host-parasite (l), symbiont-parasite (m), and host-symbiont (r) specificities. Each matrix has a symmetric version with the same property.
